# Supplementary material for: Deletion of TSPO Causes Dysregulation of Cholesterol Metabolism in Mouse Retina
Source: Cells. 2021 Nov 7;10(11):3066. doi: 10.3390/cells10113066 (PMC8621976; doi:10.3390/cells10113066)
Supplement: Supplementary file 1 [file cells-10-03066-s001.zip › cells-1456954-supplementary.pdf]

## Supplementary data

**Table S1.** Primers for qRT-PCR.

| Gene                                   | Forward Primer (5'-3')   | Reverse Primer (5'-3')   |
|----------------------------------------|--------------------------|--------------------------|
| <i>Il-1 <math>\beta</math></i>         | CAGGCAGGCAGTATCACTCA     | AGCTCATATGGGTCCGACAG     |
| <i>Tnf-<math>\alpha</math></i>         | ACGTGGAACTGGCAGAAGAG     | AGGGTCTGGGCCATAGAACT     |
| <i>Il-6</i>                            | TACCACTTCACAAGTCG        | CTGCAAGTGCATCATCG        |
| <i>Nr1h3</i><br>(coding LXR $\alpha$ ) | CCCTAGCCTTTCCCCAAATTGC   | CGGAAGAATCCCTTGCAACC     |
| <i>Abca1</i>                           | AGTTTCGGTATGGCGGGTTT     | AGCATGCCAGCCCTTGTTAT     |
| <i>Abcg1</i>                           | ACCTACCACAACCCAGCAGACTTT | GGTGCCAAAGAAACGGGTTCACAT |
| <i>Cyp27a1</i>                         | GCCTTGACACAAGGAAGTGACT   | CGCAGGGTCTCCTTAATCACA    |
| <i>Cyp46a1</i>                         | CCCTAGCCTTTCCCCAAATTGC   | CGGAAGAATCCCTTGCAACC     |
| <i>Tmem119</i>                         | CCTTCACCCAGAGCTGGTTC     | GGCTACATCCTCCAGGAAGG     |
| <i>Gapdh</i>                           | GTCTCCTGCGACTTCAGC       | TCATTGTCATACCAGGAAATGAGC |

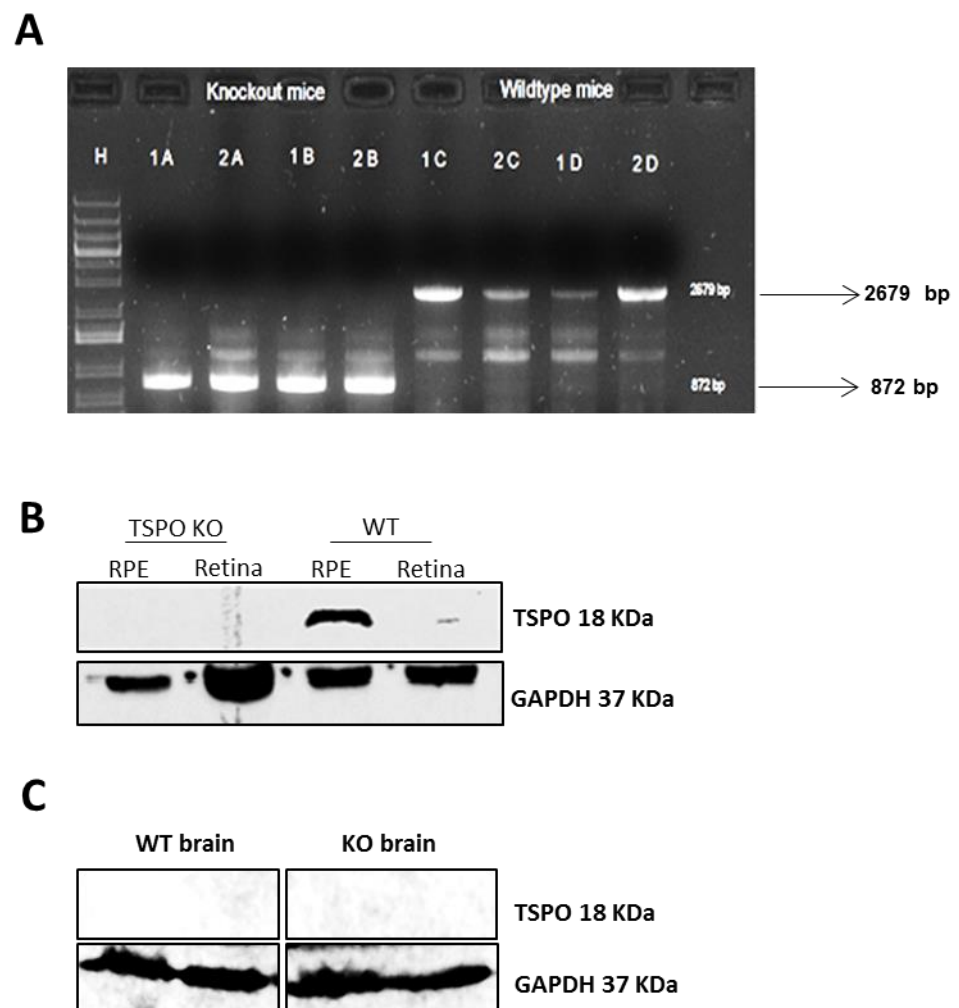

**Figure S1.** Genotyping of wildtype (flx) and TSPO KO (DD4X) mouse by PCR (**A**). Lane 1: 1kb plus DNA ladder; Lane 2-5: KO amplicon gave 872bp band; Lane 6-9: WT amplicon gave 2679bp band. WT and TSPO-KO mice (**B**) RPE, Retina and (**C**) Brain were screened for TSPO protein expression using a monoclonal TSPO antibody. The TSPO-deleted colonies in (RPE, Retina and Brain) were identified by Western blotting.

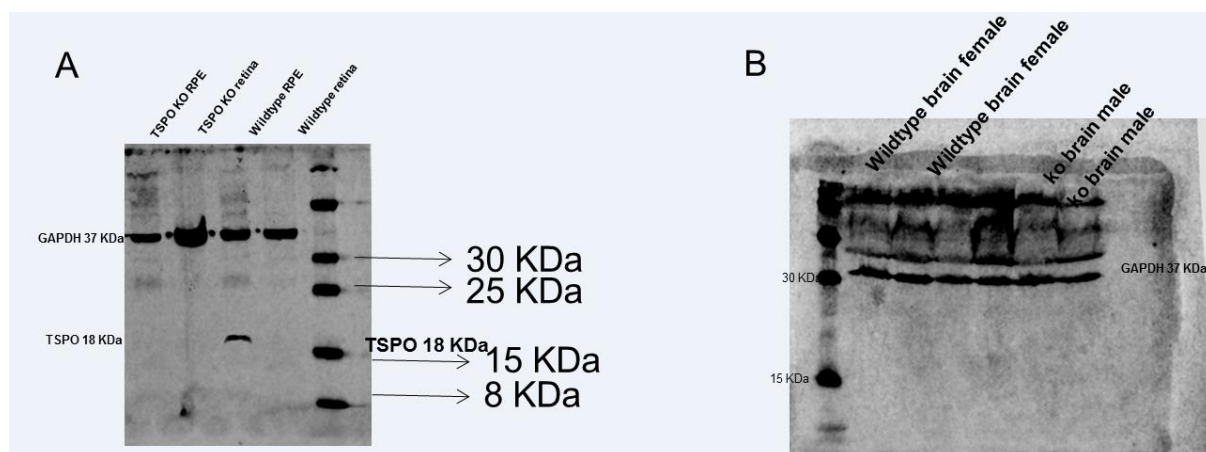

**Figure S2.** The original gel images for data presented in Figure S1B and C.

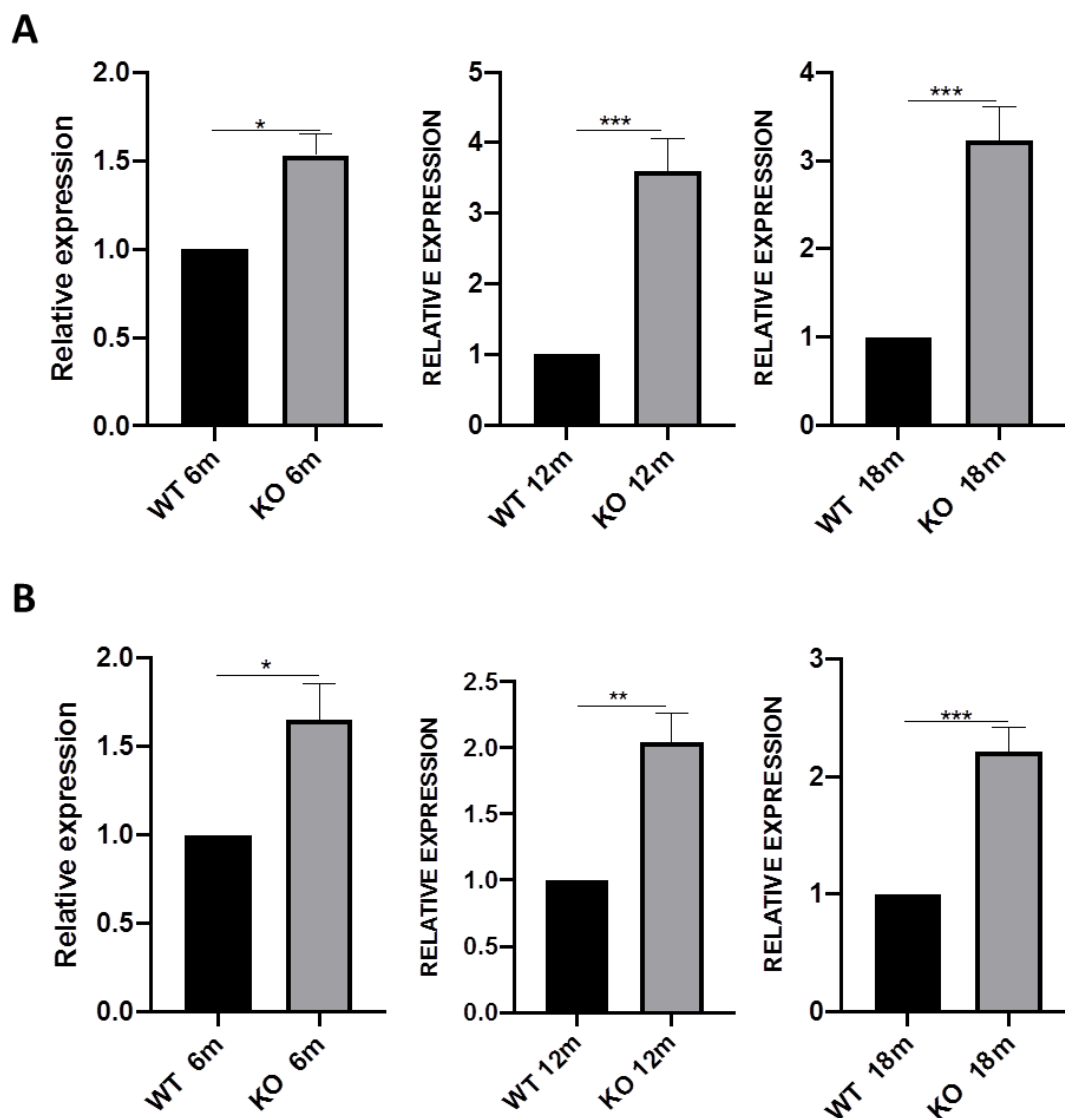

**Figure S3.** The expression of microglial biomarker, *Tmem119* gene, in RPE/choroid/sclera (**A**) and retinas (**B**) of wildtype and Tspo KO mice at age of 6, 12 and 18 months. The qRT-PCR data was collected as ct (Cycle threshold) values and normalised to *Gapdh* then analysed by  $2^{-\Delta\Delta CT}$  formula. The data were presented as means  $\pm$  SD and analysed using a t-test with the appropriate post hoc test Bonferroni multiple comparisons tests. \* $p < 0.05$ , \*\* $p < 0.01$ , \*\*\* $p < 0.001$ .
